# Supplementary material for: APLP2 as a Molecular Link Between Immune Regulation and Bone Metabolism in Hepatocellular Carcinoma: Evidence from scRNA-Seq and Functional Validation
Source: Research Square preprint supplement (doi:10.21203/rs.3.rs-7785516/v1), 2025-12-11
Supplement: Supplementary file 1 [file 6e0e3dcbfba2763f04bf6600.docx]

**Single-Cell Data Quality Control**

Considering the data quality from multiple samples, cells with fewer than 200 detected genes were filtered out. The filtering formula is as follows: (nFeature_RNA > 200 & percent.mt <= median + 3 * MAD & nFeature_RNA <= median + 3 * MAD & nCount_RNA <= median + 3 * MAD), where nFeature_RNA represents the number of detected genes, nCount_RNA represents the total UMI count of the cell, and percent.mt represents the percentage of mitochondrial reads. Next, the DoubletFinder package was used to filter out doublet cells, resulting in 16,999 remaining cells. The violin plot and scatter plot after filtering are shown in Fig. S1A and S1B. We identified 2,000 highly variable genes (Fig. S1C), and subsequently performed data normalization, scaling, PCA, and harmony analysis (Fig. S1D-F).

**SCENIC Analysis and Transcriptional Regulatory Network**

We selected the Hepatocytes subgroup for SCENIC analysis and extracted all regulatory units within this subgroup. A heatmap was plotted to visualize the regulon activity scores for each cell (Fig. S2A). Next, we created activity heatmaps for the regulons' RAS (regulon activity score) in each cell group. Rows represent different regulons, while columns represent different cells. The more red the color, the higher the RAS activity score, indicating stronger regulon activity within that group (Fig. S2B). We found that the activity of 22 regulons, including ELK3, NR3C1, and JUN, was relatively high. We also used scatter plots to display the specificity ranking of transcription factors in the disease group, along with regulon specificity ranking plots for each group (Fig. S2C-D). The x-axis represents the rank, and the y-axis represents the RSS (regulon specificity score). A higher RSS indicates that the regulon may be more specifically related to the cell group. Based on the RSS scores, we identified 10 key transcription factors in liver cancer: JUN, JUND, NFIC, ATF3, FOSB, RUNX3, REL, FOSB, ETS1, and JUNB. Finally, we presented the regulatory network of all regulatory units (Fig. S2E).

**Table 1. Sequence of primers were used in this study.**

| Genes | Forward | Reverse |
| --- | --- | --- |
| 18S(h) | 5’-GTTCCGACCATAAACGATGCC-3’ | 5’-TGGTGGTGCCCTTCCGTCAAT-3’ |
| APLP2(h) | 5’-CACGGGATCGTGGAGGTTG-3’ | 5’-GCTCCCTGCCACCTAAATCT-3’ |
| SERPINC1(h) | 5’-CCTGGCAGATTCCAAGAATGAC-3’ | 5’-TTGGTCACAGCAAAAGCCGT-3’ |
| PDIA6(h) | 5’-GCTAATGCACCCGGTCTGG-3’ | 5’-GCTGCTTTCTTCCATTCTGGTG-3’ |
| C1S(h) | 5’-CCACTTGCTCCTACCAGCTT-3’ | 5’-TTTCTGCACCTCCGGACTTT-3’ |
| CFB(h) | 5’-GCCAGACTATCAGGCCCATT-3’ | 5’-TGTTGCTGGCAAGTGGTAGT-3’ |
| CAT(h) | 5’-GGCCCGAAGGTCCGTTTAG-3’ | 5’-TCGGCGAATGTAAAAGTCCGT-3’ |
| SLC2A2(h) | 5’-CAATGCACCTCAACAGGTAA-3’ | 5’-CAAGGGGTTGGTTTTGGGTT-3’ |
| GAPDH(h) | 5’-TGTTGCCATCAATGACCCCTT-3’ | 5’-CTCCACGACGTACTCAGCG-3’ |
| OCN(h) | 5’- | 5’- |
| OPG(h) | 5’- | 5’- |
| ALP(h) | 5’- | 5’- |
